# Supplementary material
Source: PubMed Central journal article supplement (PMC3443154)
Supplement: 1205276109_pnas.1205276109_SI.pdf [file 1205276109_pnas.1205276109_SI.pdf]

# Supporting Information

Hansen et al. 10.1073/pnas.1205276109

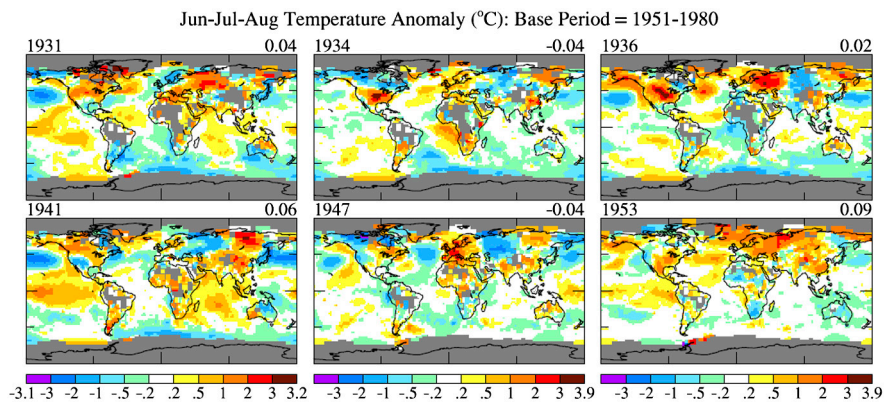

**Fig. S1.** June–July–August surface temperature anomalies in 1931, 1934, 1936, 1941, 1947, 1953. Number on upper right is the global mean (average over all area with data).

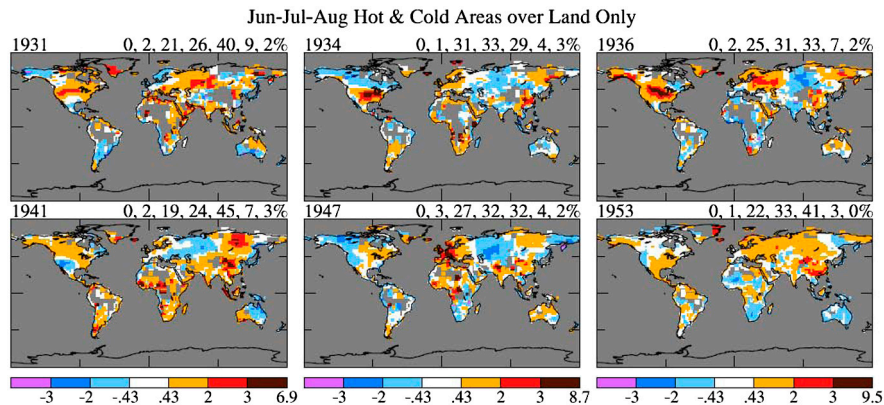

**Fig. S2.** June–July–August surface temperature anomalies over land in 1931, 1934, 1936, 1941, 1947, 1953 relative to 1951–1980 mean temperature in units of the local 1951–1980 standard deviation of temperature. Numbers above each map are the percent of surface area covered by each category in the color bar.
